# Supplementary material for: Association of Immune-Related Adverse Events With Efficacy of Atezolizumab in Patients With Non–Small Cell Lung Cancer: Pooled Analyses of the Phase 3 IMpower130, IMpower132, and IMpower150 Randomized Clinical Trials
Source: PubMed Central journal article supplement — JAMA Oncol. 2023 Feb 16;9(4):527–35. doi: 10.1001/jamaoncol.2022.7711 (PMC9936386; doi:10.1001/jamaoncol.2022.7711), 2023-02-16
Supplement: jamaoncol-e227711-s005.pdf [file jamaoncol-e227711-s005.pdf]

## Data Sharing Statement

Socinski. Association of Immune-Related Adverse Events With Efficacy of Atezolizumab in Patients With Non-Small Cell Lung Cancer. *JAMA Oncol.* Published February 16, 2023. doi:10.1001/jamaoncol.2022.7711

### Data

**Data available:** No

### Additional Information

**Explanation for why data not available:** For up-to-date details on Roche's Global Policy on the Sharing of Clinical Information and how to request access to related clinical study documents, see [https://go.roche.com/data\\_sharing](https://go.roche.com/data_sharing). Anonymized records for individual patients across more than one data source external to Roche cannot, and should not, be linked due to a potential increase in risk of patient reidentification.
